# Supplementary material for: Racial Impact on Inpatient Stroke Quality of Care in Two Community Hospitals
Source: MDPI journal article supplement (doi:10.3390/jcm12247654), 2023-12-13
Supplement: s1 [file s1]

### Supplementary Tables

**Table S1:** Frequency and percent of missing data for the whole sample cohort

| Variable                     | Whole Missing | Whole Missing % | White Missing | White Missing % | Non-White Missing | Non-White Missing % |
|------------------------------|---------------|-----------------|---------------|-----------------|-------------------|---------------------|
| Race is White                | 28            | 2.0             | 0             | 0.0             | 0                 | 0.0                 |
| Age                          | 0             | 0.0             | 0             | 0.0             | 0                 | 0.0                 |
| Gender                       | 0             | 0.0             | 0             | 0.0             | 0                 | 0.0                 |
| Country of Origin            | 9             | 0.6             | 7             | 0.6             | 1                 | 0.5                 |
| Primary Language             | 2             | 0.1             | 1             | 0.1             | 1                 | 0.5                 |
| Interpreter                  | 5             | 0.4             | 4             | 0.4             | 1                 | 0.5                 |
| Medical History              | 0             | 0.0             | 0             | 0.0             | 0                 | 0.0                 |
| Stroke Type                  | 0             | 0.0             | 0             | 0.0             | 0                 | 0.0                 |
| Patient Arrival Mode         | 83            | 5.9             | 68            | 5.9             | 12                | 5.4                 |
| Systolic BP                  | 64            | 4.6             | 55            | 4.8             | 8                 | 3.6                 |
| Diastolic BP                 | 72            | 5.1             | 57            | 4.9             | 14                | 6.3                 |
| Glucose Blood Level          | 103           | 7.3             | 83            | 7.2             | 19                | 8.5                 |
| Disposition                  | 0             | 0.0             | 0             | 0.0             | 0                 | 0.0                 |
| Mortality (30 days)          | 24            | 1.7             | 19            | 1.6             | 4                 | 1.8                 |
| Length of Stay               | 0             | 0.0             | 0             | 0.0             | 0                 | 0.0                 |
| Ambulatory state (prior)     | 1             | 0.1             | 1             | 0.1             | 0                 | 0.0                 |
| Ambulatory state (discharge) | 288           | 20.5            | 242           | 20.9            | 34                | 15.3                |
| Readmission (30 days)        | 10            | 0.7             | 8             | 0.7             | 2                 | 0.9                 |
| A1C                          | 459           | 32.6            | 381           | 32.9            | 71                | 31.8                |
| LDL                          | 384           | 27.3            | 314           | 27.1            | 59                | 26.5                |
| EF                           | 341           | 24.2            | 280           | 24.2            | 54                | 24.2                |
| Antihypertensives in ED      | 81            | 5.8             | 65            | 5.6             | 16                | 7.2                 |
| LKW to Arrival               | 337           | 23.9            | 272           | 23.5            | 58                | 26.0                |
| Door to CT                   | 310           | 22.0            | 262           | 22.6            | 44                | 19.7                |
| Intubation in ED             | 68            | 4.8             | 51            | 4.4             | 17                | 7.6                 |

**Table S2:** Frequency and percent of missing data for the acute ischemic stroke cohort

| Variable                                 | Whole Missing | Whole Missing % | White Missing | White Missing % | Non-White Missing | Non-White Missing % |
|------------------------------------------|---------------|-----------------|---------------|-----------------|-------------------|---------------------|
| Race is White                            | 22            | 2.2             | 0             | 0.0             | 0                 | 0.0                 |
| Age                                      | 0             | 0.0             | 0             | 0.0             | 0                 | 0.0                 |
| Gender                                   | 0             | 0.0             | 0             | 0.0             | 0                 | 0.0                 |
| Country of Origin                        | 7             | 0.7             | 6             | 0.7             | 1                 | 0.6                 |
| Primary Language                         | 1             | 0.1             | 1             | 0.1             | 0                 | 0.0                 |
| Interpreter                              | 3             | 0.3             | 3             | 0.4             | 0                 | 0.0                 |
| Medical History                          | 0             | 0.0             | 0             | 0.0             | 0                 | 0.0                 |
| Patient Arrival Mode                     | 74            | 7.3             | 62            | 7.5             | 9                 | 5.5                 |
| Systolic BP                              | 19            | 1.9             | 14            | 1.7             | 4                 | 2.4                 |
| Diastolic BP                             | 56            | 5.5             | 45            | 5.4             | 10                | 6.1                 |
| Glucose Blood Level                      | 74            | 7.3             | 61            | 7.3             | 12                | 7.3                 |
| Disposition                              | 0             | 0.0             | 0             | 0.0             | 0                 | 0.0                 |
| Mortality (30 days)                      | 18            | 1.8             | 13            | 1.6             | 4                 | 2.4                 |
| Length of Stay                           | 0             | 0.0             | 0             | 0.0             | 0                 | 0.0                 |
| Ambulatory state (prior)                 | 1             | 0.1             | 1             | 0.1             | 0                 | 0.0                 |
| Ambulatory state (discharge)             | 114           | 11.2            | 93            | 11.2            | 11                | 6.7                 |
| Readmission (30 days)                    | 7             | 0.7             | 5             | 0.6             | 2                 | 1.2                 |
| A1C                                      | 255           | 25.0            | 209           | 25.1            | 40                | 24.2                |
| LDL                                      | 175           | 17.2            | 144           | 17.3            | 23                | 13.9                |
| EF                                       | 175           | 17.2            | 141           | 17.0            | 29                | 17.6                |
| Antihypertensives in ED                  | 62            | 6.1             | 51            | 6.1             | 11                | 6.7                 |
| Initial NIHSS 1                          | 260           | 25.5            | 207           | 24.9            | 46                | 27.9                |
| NIHSS (24 hours)                         | 311           | 30.5            | 255           | 30.7            | 48                | 29.1                |
| LKW to Arrival                           | 269           | 26.4            | 218           | 26.2            | 46                | 27.9                |
| IV Thrombolytic received (this hospital) | 1             | 0.1             | 1             | 0.1             | 0                 | 0.0                 |
| Door to CT                               | 226           | 22.2            | 189           | 22.7            | 34                | 20.6                |

**Table S3:** Frequency and percent of missing data for the transient ischemic attack cohort

| Variable                     | Whole Missing | Whole Missing % | White Missing | White Missing % | Non-White Missing | Non-White Missing % |
|------------------------------|---------------|-----------------|---------------|-----------------|-------------------|---------------------|
| Race is White                | 1             | 0.5             | 0             | 0.0             | 0                 | 0.0                 |
| Age                          | 0             | 0.0             | 0             | 0.0             | 0                 | 0.0                 |
| Gender                       | 0             | 0.0             | 0             | 0.0             | 0                 | 0.0                 |
| Country of Origin            | 0             | 0.0             | 0             | 0.0             | 0                 | 0.0                 |
| Primary Language             | 0             | 0.0             | 0             | 0.0             | 0                 | 0.0                 |
| Interpreter                  | 1             | 0.5             | 1             | 0.5             | 0                 | 0.0                 |
| Medical History              | 0             | 0.0             | 0             | 0.0             | 0                 | 0.0                 |
| Patient Arrival Mode         | 3             | 1.4             | 2             | 1.0             | 1                 | 5.3                 |
| Systolic BP                  | 36            | 16.7            | 34            | 17.4            | 2                 | 10.5                |
| Diastolic BP                 | 10            | 4.6             | 7             | 3.6             | 3                 | 15.8                |
| Glucose Blood Level          | 18            | 8.3             | 14            | 7.1             | 4                 | 21.1                |
| Disposition                  | 0             | 0.0             | 0             | 0.0             | 0                 | 0.0                 |
| Mortality (30 days)          | 3             | 1.4             | 3             | 1.5             | 0                 | 0.0                 |
| Mortality (90 days)          | 6             | 2.8             | 6             | 3.1             | 0                 | 0.0                 |
| Length of Stay               | 0             | 0.0             | 0             | 0.0             | 0                 | 0.0                 |
| Ambulatory state (prior)     | 0             | 0.0             | 0             | 0.0             | 0                 | 0.0                 |
| Ambulatory state (discharge) | 100           | 46.3            | 94            | 48.0            | 5                 | 26.3                |
| Readmission (30 days)        | 2             | 0.9             | 2             | 1.0             | 0                 | 0.0                 |
| A1C                          | 92            | 42.6            | 86            | 43.9            | 6                 | 31.6                |
| LDL                          | 80            | 37.0            | 74            | 37.8            | 6                 | 31.6                |
| EF                           | 71            | 32.9            | 63            | 32.1            | 8                 | 42.1                |
| Antihypertensives in ED      | 12            | 5.6             | 8             | 4.1             | 4                 | 21.1                |
| Initial NIHSS 1              | 66            | 30.6            | 59            | 30.1            | 6                 | 31.6                |
| LKW to Arrival               | 20            | 9.3             | 18            | 9.2             | 2                 | 10.5                |
| EKG                          | 8             | 3.7             | 5             | 2.6             | 3                 | 15.8                |
| TTE                          | 8             | 3.7             | 5             | 2.6             | 3                 | 15.8                |
| TEE                          | 29            | 13.4            | 23            | 11.7            | 6                 | 31.6                |
| CT Angio                     | 9             | 4.2             | 6             | 3.1             | 3                 | 15.8                |
| MRA                          | 73            | 33.8            | 65            | 33.2            | 7                 | 36.8                |

**Table S4:** Frequency and percent of missing data for the intracerebral hemorrhage cohort

| Variable                     | Whole Missing | Whole Missing % | White Missing | White Missing % | Non-White Missing | Non-White Missing % |
|------------------------------|---------------|-----------------|---------------|-----------------|-------------------|---------------------|
| Race is White                | 3             | 2.5             | 0             | 0.0             | 0                 | 0.0                 |
| Age                          | 0             | 0.0             | 0             | 0.0             | 0                 | 0.0                 |
| Gender                       | 0             | 0.0             | 0             | 0.0             | 0                 | 0.0                 |
| Country of Origin            | 1             | 0.8             | 1             | 1.1             | 0                 | 0.0                 |
| Primary Language             | 1             | 0.8             | 0             | 0.0             | 1                 | 3.6                 |
| Interpreter                  | 1             | 0.8             | 0             | 0.0             | 1                 | 3.6                 |
| Medical History              | 0             | 0.0             | 0             | 0.0             | 0                 | 0.0                 |
| Patient Arrival Mode         | 4             | 3.3             | 2             | 2.2             | 2                 | 7.1                 |
| Systolic BP                  | 5             | 4.1             | 4             | 4.4             | 1                 | 3.6                 |
| Diastolic BP                 | 5             | 4.1             | 5             | 5.5             | 0                 | 0.0                 |
| Glucose Blood Level          | 7             | 5.7             | 6             | 6.6             | 1                 | 3.6                 |
| Disposition                  | 0             | 0.0             | 0             | 0.0             | 0                 | 0.0                 |
| Mortality (30 days)          | 3             | 2.5             | 3             | 3.3             | 0                 | 0.0                 |
| Length of Stay               | 0             | 0.0             | 0             | 0.0             | 0                 | 0.0                 |
| Ambulatory state (prior)     | 0             | 0.0             | 0             | 0.0             | 0                 | 0.0                 |
| Ambulatory state (discharge) | 50            | 41.0            | 39            | 42.9            | 11                | 39.3                |
| Readmission (30 days)        | 1             | 0.8             | 1             | 1.1             | 0                 | 0.0                 |
| A1C                          | 72            | 59.0            | 56            | 61.5            | 16                | 57.1                |
| Antihypertensives in ED      | 6             | 4.9             | 6             | 6.6             | 0                 | 0.0                 |
| LKW to Arrival               | 31            | 25.4            | 21            | 23.1            | 9                 | 32.1                |
| Door to CT                   | 8             | 6.6             | 6             | 6.6             | 2                 | 7.1                 |
| Glasgow Coma Scale           | 20            | 16.4            | 13            | 14.3            | 7                 | 25.0                |
| Intubation in ED             | 11            | 9.0             | 10            | 11.0            | 1                 | 3.6                 |
| EVD Placement                | 7             | 5.7             | 7             | 7.7             | 0                 | 0.0                 |
| Decompressive Craniectomy    | 7             | 5.7             | 7             | 7.7             | 0                 | 0.0                 |
| Hematoma Evacuation          | 7             | 5.7             | 7             | 7.7             | 0                 | 0.0                 |

**Table S5:** Frequency and percent of missing data for the subarachnoid hemorrhage cohort

| Variable                     | Whole Missing | Whole Missing % | White Missing | White Missing % | Non-White Missing | Non-White Missing % |
|------------------------------|---------------|-----------------|---------------|-----------------|-------------------|---------------------|
| Race is White                | 2             | 4.9             | 0             | 0.0             | 0                 | 0.0                 |
| Age                          | 0             | 0.0             | 0             | 0.0             | 0                 | 0.0                 |
| Gender                       | 0             | 0.0             | 0             | 0.0             | 0                 | 0.0                 |
| Country of Origin            | 1             | 2.4             | 0             | 0.0             | 0                 | 0.0                 |
| Primary Language             | 0             | 0.0             | 0             | 0.0             | 0                 | 0.0                 |
| Interpreter                  | 0             | 0.0             | 0             | 0.0             | 0                 | 0.0                 |
| Medical History              | 0             | 0.0             | 0             | 0.0             | 0                 | 0.0                 |
| Patient Arrival Mode         | 2             | 4.9             | 2             | 6.5             | 0                 | 0.0                 |
| Systolic BP                  | 3             | 7.3             | 2             | 6.5             | 1                 | 12.5                |
| Diastolic BP                 | 1             | 2.4             | 0             | 0.0             | 1                 | 12.5                |
| Glucose Blood Level          | 3             | 7.3             | 1             | 3.2             | 2                 | 25.0                |
| Disposition                  | 0             | 0.0             | 0             | 0.0             | 0                 | 0.0                 |
| Mortality (30 days)          | 0             | 0.0             | 0             | 0.0             | 0                 | 0.0                 |
| Length of Stay               | 0             | 0.0             | 0             | 0.0             | 0                 | 0.0                 |
| Ambulatory state (prior)     | 0             | 0.0             | 0             | 0.0             | 0                 | 0.0                 |
| Ambulatory state (discharge) | 23            | 56.1            | 15            | 48.4            | 7                 | 87.5                |
| Readmission (30 days)        | 0             | 0.0             | 0             | 0.0             | 0                 | 0.0                 |
| Antihypertensives in ED      | 1             | 2.4             | 0             | 0.0             | 1                 | 12.5                |
| LKW to Arrival               | 13            | 31.7            | 11            | 35.5            | 1                 | 12.5                |
| Door to CT                   | 1             | 2.4             | 0             | 0.0             | 1                 | 12.5                |
| Glasgow Coma Scale           | 7             | 17.1            | 2             | 6.5             | 5                 | 62.5                |
| Intubation in ED             | 1             | 2.4             | 0             | 0.0             | 1                 | 12.5                |
| EVD Placement                | 1             | 2.4             | 0             | 0.0             | 1                 | 12.5                |
| Aneurysm Coiling             | 1             | 2.4             | 0             | 0.0             | 1                 | 12.5                |
| Aneurysm Clipping            | 2             | 4.9             | 1             | 3.2             | 1                 | 12.5                |
| CT Angio                     | 1             | 2.4             | 0             | 0.0             | 1                 | 12.5                |
| MRA                          | 16            | 39.0            | 10            | 32.3            | 4                 | 50.0                |

**Table S6:** Reasons for not administering IV thrombolysis

|                                                                                                            | White<br>(n=620) | Non-<br>White<br>(n=112) |
|------------------------------------------------------------------------------------------------------------|------------------|--------------------------|
| Elevated blood pressure (SBP>185 mm Hg or DBP>110 mm Hg) despite treatment                                 | 11 (1.3%)        | 0                        |
| Recent intracranial or spinal surgery or significant head trauma or prior stroke in previous 3 months      | 24 (3.9%)        | 8 (7.1%)                 |
| History of previous intracranial hemorrhage, intracranial neoplasm, arteriovenous malformation or aneurysm | 11 (1.8%)        | 3 (2.7%)                 |
| Active internal bleeding                                                                                   | 2 (0.3%)         | 0                        |
| Acute bleeding diathesis (low platelet count, increased PTT, INR≥1.7, or use of NOAC)                      | 76<br>(12.3%)    | 7 (6.3%)                 |
| Symptoms suggest subarachnoid hemorrhage                                                                   | 1 (0.2%)         | 0                        |
| CT demonstrates multilobar infarction (hypodensity>1/3 cerebral hemisphere)                                | 0                | 1 (0.9%)                 |
| Care-team unable to determine eligibility                                                                  | 316 (51%)        | 75 (67%)                 |
| IV or IA thrombolysis/thrombectomy at an outside hospital prior to arrival                                 | 8 (1.3%)         | 2 (1.8)                  |
| Life expectancy<1 year or severe co-morbid illness or CMO on admission                                     | 10 (1.6%)        | 0                        |
| Pregnancy                                                                                                  | 0                | 0                        |
| Patient/family refusal                                                                                     | 7 (1.1%)         | 2 (1.8%)                 |
| Stroke severity too mild (non-disabling)                                                                   | 144<br>(23.2%)   | 13<br>(11.6%)            |
| Seizure at onset with postictal residual neurological impairments                                          | 0                | 1 (0.9%)                 |
| Major surgery or serious trauma within previous 14 days                                                    | 7 (1.1%)         | 0                        |
| Recent gastrointestinal or urinary tract hemorrhage (within previous 21 days)                              | 3 (0.5%)         | 0                        |
